# Supplementary material for: Trait Plasticity among Invasive Populations of the Ant Technomyrmex brunneus in Japan
Source: MDPI journal article supplement (doi:10.3390/ani11092702), 2021-09-15
Supplement: s1 [file s1]

**Table S1.** Sampling sites and breakdown of analytical methods for *T. brunneus* samples. Geographic coordinates are given in decimal degrees. Usage of each sample for different analyses indicated by circles (see main methods).

| Island      | Sample ID | Latitude | Longitude | Aggression assays | Isotopic analysis | Population genetic analysis | Morphological analysis |
|-------------|-----------|----------|-----------|-------------------|-------------------|-----------------------------|------------------------|
| Hachijojima | MYH001    | 33.1204  | 139.8087  |                   | o                 |                             |                        |
|             | MYH002    | 33.1196  | 139.8086  |                   | o                 |                             |                        |
|             | MYH003    | 33.1197  | 139.8074  |                   | o                 |                             | o                      |
|             | MYH004    | 33.1133  | 139.7874  |                   | o                 | o                           | o                      |
|             | MYH005    | 33.1157  | 139.7924  |                   | o                 | o                           |                        |
|             | MYH006    | 33.1151  | 139.7950  |                   | o                 |                             |                        |
|             | MYH007    | 33.1212  | 139.8062  |                   | o                 |                             |                        |
|             | MYH008    | 33.1572  | 139.7596  | o                 | o                 | o                           |                        |
|             | MYH009    | 33.1571  | 139.7583  |                   | o                 | o                           | o                      |
|             | MYH010    | 33.1448  | 139.7857  | o                 | o                 |                             |                        |
|             | MYH011    | 33.1416  | 139.7915  | o                 | o                 | o                           | o                      |
|             | MYH012    | 33.1091  | 139.7802  |                   | o                 |                             |                        |
|             | MYH013    | 33.1095  | 139.7779  | o                 | o                 | o                           |                        |
|             | MYH014    | 33.1100  | 139.7754  |                   | o                 |                             |                        |
|             | MYH015    | 33.1119  | 139.7714  | o                 | o                 |                             | o                      |
|             | MYH016    | 33.1109  | 139.7650  | o                 | o                 |                             |                        |
|             | MYH017    | 33.1105  | 139.7594  |                   | o                 |                             |                        |
|             | MYH018    | 33.1077  | 139.7567  |                   | o                 | o                           |                        |
|             | MYH019    | 33.1022  | 139.7752  | o                 | o                 | o                           |                        |
|             | MYH020    | 33.1035  | 139.7775  |                   | o                 |                             |                        |
|             | MYH021    | 33.1190  | 139.8137  | o                 | o                 |                             |                        |
|             | MYH022    | 33.1187  | 139.8176  | o                 | o                 | o                           |                        |
|             | MYH023    | 33.1170  | 139.8221  |                   | o                 | o                           |                        |
|             | MYH024    | 33.0809  | 139.8526  | o                 | o                 | o                           | o                      |
|             | MYH025    | 33.0662  | 139.8110  | o                 | o                 | o                           | o                      |
|             | MYH026    | 33.0689  | 139.8045  |                   | o                 |                             |                        |
|             | MYH027    | 33.0700  | 139.7982  |                   | o                 |                             |                        |
|             | MYH028    | 33.0640  | 139.7955  | o                 | o                 |                             |                        |
|             | MYH029    | 33.0693  | 139.7968  |                   | o                 |                             |                        |
|             | MYH030    | 33.0736  | 139.7972  | o                 | o                 |                             |                        |
|             | MYH031    | 33.0753  | 139.7866  | o                 | o                 | o                           | o                      |
|             | MYH032    | 33.0934  | 139.7809  | o                 | o                 |                             |                        |
|             | MYH033    | 33.0877  | 139.7814  |                   | o                 |                             |                        |
|             | MYH034    | 33.0891  | 139.7825  |                   | o                 |                             |                        |
|             | MYH035    | 33.0992  | 139.7793  | o                 | o                 | o                           |                        |
|             | MYH036    | 33.1020  | 139.7869  |                   | o                 |                             |                        |
|             | MYH037    | 33.1210  | 139.8116  |                   | o                 |                             |                        |

|            |        |         |          |   |   |   |   |
|------------|--------|---------|----------|---|---|---|---|
|            | MYH038 | 33.1197 | 139.8151 |   | o |   |   |
|            | MYH039 | 33.1230 | 139.8131 |   | o |   |   |
|            | MYH040 | 33.1256 | 139.8114 |   | o |   |   |
|            | MYH041 | 33.1284 | 139.8085 |   | o |   |   |
|            | MYH042 | 33.1249 | 139.8060 |   | o |   |   |
|            | MYH043 | 33.1224 | 139.8035 |   | o |   |   |
|            | ACH001 | 33.1222 | 139.8073 |   | o |   |   |
|            | ACH002 | 33.1232 | 139.8000 |   | o | o | o |
|            | ACH003 | 33.1235 | 139.7932 |   | o |   |   |
|            | ACH004 | 33.1250 | 139.7887 |   | o | o | o |
| Okinawa    | DPO001 | 26.0869 | 127.6781 | o | o | o | o |
|            | DPO003 | 26.0867 | 127.6856 | o | o | o | o |
|            | DPO004 | 26.2523 | 127.7799 | o | o | o | o |
|            | DPO005 | 26.4082 | 127.7411 |   |   | o |   |
|            | DPO006 | 26.6571 | 127.9717 | o | o | o | o |
|            | DPO007 | 26.6562 | 127.9759 | o | o | o |   |
|            | DPO008 | 26.5634 | 127.9864 |   | o | o | o |
|            | DPO010 | 26.4345 | 127.8188 | o | o | o | o |
|            | DPO011 | 26.4347 | 127.8188 | o | o | o |   |
|            | DPO012 | 26.4795 | 127.9164 | o | o | o | o |
|            | DPO013 | 26.4833 | 127.9344 | o | o | o | o |
|            | DPO014 | 26.4606 | 127.8802 | o | o | o | o |
|            | DPO015 | 26.4213 | 127.8173 | o | o | o |   |
|            | DPO016 | 26.2518 | 127.7646 | o | o | o |   |
|            | DPO017 | 26.1718 | 127.7332 |   |   | o | o |
|            | EEO030 | 26.8360 | 128.2719 |   |   | o |   |
|            | EEO031 | 26.8363 | 128.2705 |   |   | o |   |
|            | EEO035 | 26.7389 | 128.2372 |   |   | o |   |
|            | EEO051 | 26.6045 | 128.1426 |   |   | o |   |
|            | EEO052 | 26.6046 | 128.1435 |   |   | o |   |
|            | EEO067 | 26.6397 | 128.0626 |   |   | o |   |
| Chichijima | DPC001 | 27.0642 | 142.1943 | o |   |   |   |
|            | DPC002 | 27.0642 | 142.1946 | o |   | o |   |
|            | DPC003 | 27.0644 | 142.1947 | o | o | o | o |
|            | DPC004 | 27.0690 | 142.2034 | o |   |   |   |
|            | DPC005 | 27.0689 | 142.2028 | o | o | o |   |
|            | DPC006 | 27.1003 | 142.1979 | o | o | o |   |
|            | DPC007 | 27.1002 | 142.1978 | o |   |   |   |
|            | DPC008 | 27.0969 | 142.1934 | o |   |   |   |
|            | DPC009 | 27.0973 | 142.1936 | o | o | o |   |
|            | DPC010 | 27.1034 | 142.1945 | o |   |   |   |
|            | DPC011 | 27.1033 | 142.1937 | o | o | o |   |
|            | DPC012 | 27.1016 | 142.1955 | o | o |   | o |

|        |         |          |   |   |   |   |
|--------|---------|----------|---|---|---|---|
| DPC013 | 27.0992 | 142.2061 |   |   |   |   |
| DPC014 | 27.0994 | 142.2060 | o | o | o |   |
| DPC015 | 27.0983 | 142.2122 | o | o | o |   |
| DPC016 | 27.0994 | 142.2135 | o |   | o |   |
| DPC017 | 27.0960 | 142.2144 | o | o | o |   |
| DPC018 | 27.0955 | 142.2142 | o |   |   |   |
| DPC019 | 27.0955 | 142.2140 | o | o | o | o |
| DPC020 | 27.0954 | 142.2125 | o | o | o |   |
| DPC021 | 27.0927 | 142.2172 | o | o | o |   |
| DPC022 | 27.0868 | 142.2194 | o |   |   |   |
| DPC023 | 27.0724 | 142.2196 | o | o | o | o |
| DPC024 | 27.0762 | 142.2204 | o | o | o |   |
| DPC025 | 27.0756 | 142.2210 | o | o | o | o |
| DPC026 | 27.0614 | 142.2222 | o | o | o |   |
| DPC027 | 27.0642 | 142.1943 | o | o | o | o |
| DPC028 | NA      | NA       | o |   |   |   |
| DPC029 | 27.0942 | 142.1930 |   | o | o | o |
| DPC030 | 27.0894 | 142.1875 | o |   | o |   |
| DPC031 | 27.0895 | 142.1882 |   | o | o | o |
| DPC032 | 27.0956 | 142.2041 |   | o | o | o |
| DPC033 | 27.0878 | 142.2053 |   | o | o |   |
| DPC034 | 27.0730 | 142.2042 | o |   |   |   |
| DPC035 | 27.0603 | 142.1965 | o | o | o |   |
| DPC036 | 27.0707 | 142.1896 | o | o | o | o |
| DPC037 | 27.0703 | 142.1897 |   | o |   |   |
| DPC038 | 27.0861 | 142.2068 | o |   |   |   |
| DPC039 | 27.0942 | 142.1930 |   |   |   |   |
| OGA001 | 27.0615 | 142.2218 |   |   | o |   |

---

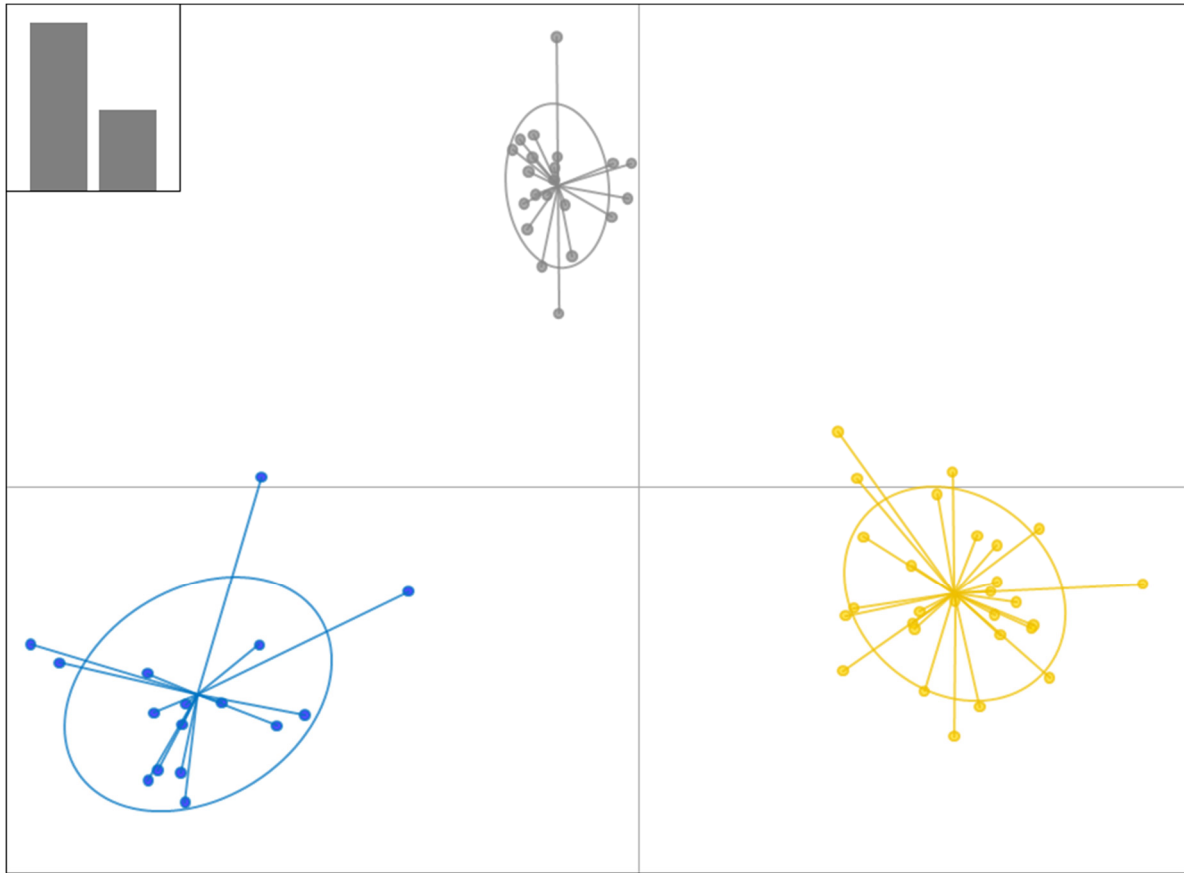

**Figure S1.** DAPC scatter plot of three populations based on 428 SNPs. Inset shows eigen values for two main discriminate analysis axes. Gold points indicate Ogasawara, blue Hachijojima, and grey Okinawa.

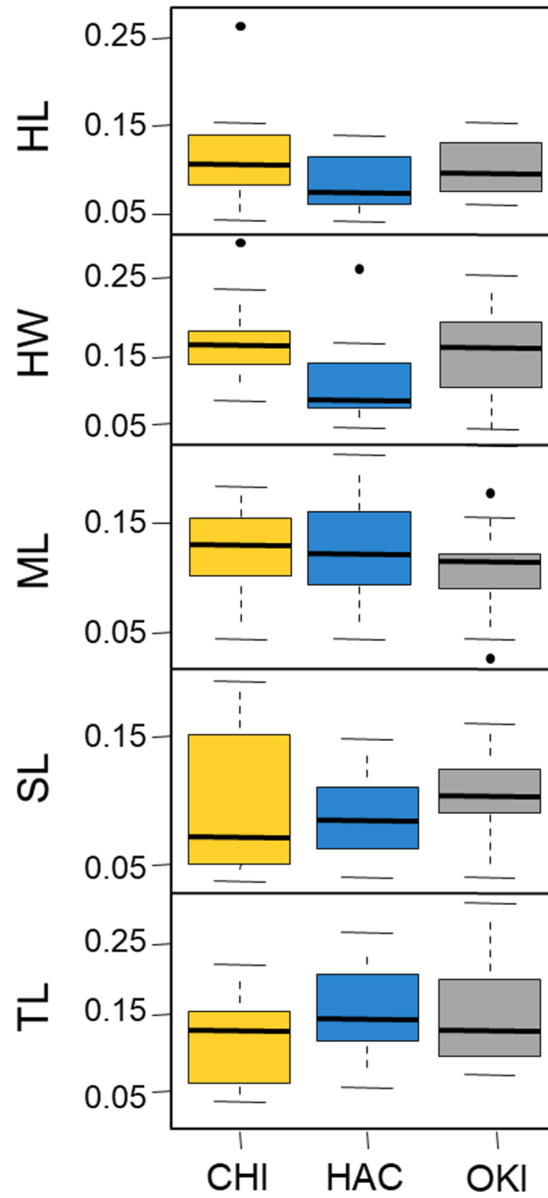

**Figure S2.** Box plot of intra-colony coefficient of variation (COV) for each morphological trait between islands. There was no significant difference for any of the five morphological characteristics (ANOVA: HW ( $F_2 = 1.86$ ,  $P = 0.175$ ), HL ( $F_2 = 1.626$ ,  $P = 0.215$ ), TL ( $F_2 = 0.909$ ,  $P = 0.415$ ), ML ( $F_2 = 0.506$ ,  $P = 0.608$ ) and SL ( $F_2 = 0.301$ ,  $P = 0.734$ )). Gold bars indicate Ogasawara, blue Hachijojima, and grey Okinawa.
